# Supplementary material for: Cost-Effectiveness of Robot-Assisted Radical Cystectomy vs Open Radical Cystectomy for Patients With Bladder Cancer
Source: PubMed Central journal article supplement (PMC10314306; doi:10.1001/jamanetworkopen.2023.17255), 2023-06-30
Supplement: jamanetwopen-e2317255-s002.pdf [file jamanetwopen-e2317255-s002.pdf]

\*First name, last name, and suffix (if applicable) are required and will appear in PubMed.

| <b>*Group Name(s): iROC Study Team</b>   |                   |                              |                  |                                     |                                          |                                                         |                                                                                            |
|------------------------------------------|-------------------|------------------------------|------------------|-------------------------------------|------------------------------------------|---------------------------------------------------------|--------------------------------------------------------------------------------------------|
| <b>*First Name and Middle Initial(s)</b> | <b>*Last Name</b> | <b>*Suffix (eg, Jr, III)</b> | Academic Degrees | Institution                         | Location (city, state/province, country) | Role or Contribution, eg, chair, principal investigator | Group (if more than 1 Group listed in the byline and/or Subgroup (eg, Steering Committee)) |
| E Ruth                                   | Groves            |                              |                  | Sheffield Teaching Hospital NHS Fou | Sheffield, UK                            | Medical staff involved in patient care                  |                                                                                            |
| Louise                                   | Goodwin           |                              |                  | Sheffield Teaching Hospital NHS Fou | Sheffield, UK                            | Research Nurse                                          |                                                                                            |
| Jayne                                    | Willson           |                              |                  | Sheffield Teaching Hospital NHS Fou | Sheffield, UK                            | Research Nurse                                          |                                                                                            |
| Phillip                                  | Ravencroft        |                              |                  | Sheffield Teaching Hospital NHS Fou | Sheffield, UK                            | Research Nurse                                          |                                                                                            |
| Stephen                                  | Kennish           |                              |                  | Sheffield Teaching Hospital NHS Fou | Sheffield, UK                            | Medical staff involved in patient care                  |                                                                                            |
| Derek J                                  | Rosario           |                              |                  | Sheffield Teaching Hospital NHS Fou | Sheffield, UK                            | Medical staff involved in patient care                  |                                                                                            |
| Carol                                    | Torrington        |                              |                  | Sheffield Teaching Hospital NHS Fou | Sheffield, UK                            | Admin and secretarial support                           |                                                                                            |
| Rajesh                                   | Nair              |                              |                  | Guys and St Thomas' NHS Foundatio   | London, UK                               | Medical staff involved in patient care                  |                                                                                            |
| Ramesh                                   | Thurairaja        |                              |                  | Guys and St Thomas' NHS Foundatio   | London, UK                               | Medical staff involved in patient care                  |                                                                                            |
| Sue                                      | Amery             |                              |                  | Guys and St Thomas' NHS Foundatio   | London, UK                               | Bladder cancer clinical nurse specialist                |                                                                                            |
| Kathryn                                  | Chatterton        |                              |                  | Guys and St Thomas' NHS Foundatio   | London, UK                               | Bladder cancer clinical nurse specialist                |                                                                                            |
| Samantha                                 | Broadhead         |                              |                  | Guys and St Thomas' NHS Foundatio   | London, UK                               | Research Nurse                                          |                                                                                            |
| David                                    | Hendry            |                              |                  | NHS Greater Glasgow and Clyde       | Glasgow, UK                              | Medical staff involved in patient care                  |                                                                                            |
| Abdullah                                 | Zreik             |                              |                  | NHS Greater Glasgow and Clyde       | Glasgow, UK                              | Medical staff involved in patient care                  |                                                                                            |
| Sunjay                                   | Jain              |                              |                  | Leeds Teaching Hospitals NHS Trust  | Leeds, UK                                | Medical staff involved in patient care                  |                                                                                            |
| Steve                                    | Prescott          |                              |                  | Leeds Teaching Hospitals NHS Trust  | Leeds, UK                                | Medical staff involved in patient care                  |                                                                                            |
| Hannah                                   | Roberts           |                              |                  | Leeds Teaching Hospitals NHS Trust  | Leeds, UK                                | Research Nurse                                          |                                                                                            |
| Angela                                   | Morgan            |                              |                  | Leeds Teaching Hospitals NHS Trust  | Leeds, UK                                | Research Nurse                                          |                                                                                            |
| Chris                                    | Main              |                              |                  | Leeds Teaching Hospitals NHS Trust  | Leeds, UK                                | Research Nurse                                          |                                                                                            |
| Elsbeth                                  | Bedford           |                              |                  | Leeds Teaching Hospitals NHS Trust  | Leeds, UK                                | Admin and secretarial support                           |                                                                                            |
| Lorraine                                 | Wiseman           |                              |                  | Leeds Teaching Hospitals NHS Trust  | Leeds, UK                                | Research Nurse                                          |                                                                                            |
| Bernice                                  | Mpofu             |                              |                  | Leeds Teaching Hospitals NHS Trust  | Leeds, UK                                | Medical staff involved in patient care                  |                                                                                            |
| Claire                                   | Daisey            |                              |                  | Leeds Teaching Hospitals NHS Trust  | Leeds, UK                                | Research Nurse                                          |                                                                                            |
| Michelle                                 | Donachie          |                              |                  | Leeds Teaching Hospitals NHS Trust  | Leeds, UK                                | Research Nurse                                          |                                                                                            |
| Jon                                      | Aning             |                              |                  | North Bristol NHS Trust             | Bristol, UK                              | Medical staff involved in patient care                  |                                                                                            |
| Lyndsey                                  | Johnson           |                              |                  | North Bristol NHS Trust             | Bristol, UK                              | Research Nurse                                          |                                                                                            |
| Carol                                    | Brain             |                              |                  | North Bristol NHS Trust             | Bristol, UK                              | Medical staff involved in patient care                  |                                                                                            |
| Constance                                | Shiridzinomwa     |                              |                  | North Bristol NHS Trust             | Bristol, UK                              | Research Nurse                                          |                                                                                            |
| Martin                                   | Ebon              |                              |                  | Lister NHS Hospital, Stevenage      | Stevenage, UK                            | Medical staff involved in patient care                  |                                                                                            |

## Supplemental Online Content: Nonauthor Collaborators

\*First name, last name, and suffix (if applicable) are required and will appear in PubMed.

| *First Name and Middle Initial(s) | *Last Name | *Suffix (eg, Jr, III) | Academic Degrees | Institution                           | Location (city, state/province, country) | Role or Contribution, eg, chair, principal investigator | Group (if more than 1 Group listed in the byline) and/or Subgroup (eg, Steering Committee) |
|-----------------------------------|------------|-----------------------|------------------|---------------------------------------|------------------------------------------|---------------------------------------------------------|--------------------------------------------------------------------------------------------|
| Alexander                         | Hampson    |                       |                  | Lister NHS Hospital, Stevenage        | Stevenage, UK                            | Medical staff involved in patient care                  |                                                                                            |
| Roisin                            | Schimmel   |                       |                  | Lister NHS Hospital, Stevenage        | Stevenage, UK                            | Medical staff involved in patient care                  |                                                                                            |
| Scott                             | Horsley    |                       |                  | Lister NHS Hospital, Stevenage        | Stevenage, UK                            | Medical staff involved in patient care                  |                                                                                            |
| Sayyida                           | Nembhard   |                       |                  | Lister NHS Hospital, Stevenage        | Stevenage, UK                            | Medical staff involved in patient care                  |                                                                                            |
| Clare                             | Collins    |                       |                  | Lister NHS Hospital, Stevenage        | Stevenage, UK                            | Medical staff involved in patient care                  |                                                                                            |
| Jemma                             | Gilmore    |                       |                  | Lister NHS Hospital, Stevenage        | Stevenage, UK                            | Research Nurse                                          |                                                                                            |
| Faith                             | Wilson     |                       |                  | Lister NHS Hospital, Stevenage        | Stevenage, UK                            | Medical staff involved in patient care                  |                                                                                            |
| Louise                            | Peacock    |                       |                  | Lister NHS Hospital, Stevenage        | Stevenage, UK                            | Medical staff involved in patient care                  |                                                                                            |
| Sheena                            | Lim        |                       |                  | Lister NHS Hospital, Stevenage        | Stevenage, UK                            | Research Nurse                                          |                                                                                            |
| Rhosyll                           | Gabriel    |                       |                  | Lister NHS Hospital, Stevenage        | Stevenage, UK                            | Research Nurse                                          |                                                                                            |
| Rachael                           | Sarpong    |                       |                  | Surgical & Interventional Trials Unit | London, UK                               | UK Trials unit staff                                    |                                                                                            |
| Melanie                           | Tan        |                       |                  | Surgical & Interventional Trials Unit | London, UK                               | UK Trials unit staff                                    |                                                                                            |
