# Supplementary material for: Cost-Effectiveness of Robot-Assisted Radical Cystectomy vs Open Radical Cystectomy for Patients With Bladder Cancer
Source: PubMed Central journal article supplement (PMC10314306; doi:10.1001/jamanetworkopen.2023.17255), 2023-06-30
Supplement: jamanetwopen-e2317255-s003.pdf [file jamanetwopen-e2317255-s003.pdf]

## Data Sharing Statement

Dixon. Cost-effectiveness of Robot-Assisted Radical Cystectomy vs Open Radical Cystectomy for Patients With Bladder Cancer. *JAMA Netw Open*. Published June 30, 2023.

doi:10.1001/jamanetworkopen.2023.17255

### Data

**Data available:** No

### Additional Information

**Explanation for why data not available:** The underlying trial data are available for specified meta-analysis via the original article: Catto JWF, Khetrapal P, Ricciardi F, et al; iROC Study Team. Effect of robot-assisted radical cystectomy with intracorporeal urinary diversion vs open radical cystectomy on 90-day morbidity and mortality among patients with bladder cancer: a randomized clinical trial. *JAMA*. Published online May 15, 2022. doi:10.1001/jama.2022.7393
